# Supplementary figures and images for: Simultaneous Determination of Tetrodotoxin in the Fresh and Heat-Processed Aquatic Products by High-Performance Liquid Chromatography–Tandem Mass Spectrometry
Source: MDPI journal article supplement (doi:10.3390/foods11070925), 2022-03-23

Supplementary Materials

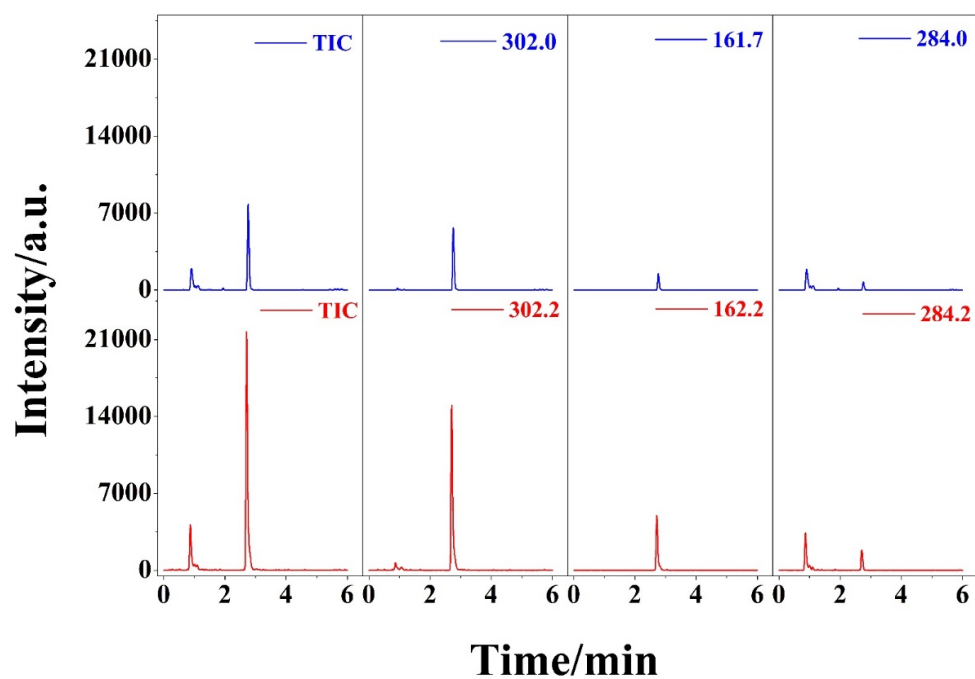

Figure S1. TIC and selective product ions chromatograms of 25 ng/mL TTX.

Supplement: s1 [file s1]
